# Supplementary material for: Axin1 Prevents Salmonella Invasiveness and Inflammatory Response in Intestinal Epithelial Cells
Source: PLOS journal article supplement (doi:10.1371/journal.pone.0034942), 2012-04-11
Supplement: S2 (10.1371/journal.pone.0034942.s002) [file journal.pone.0034942.s002]

**Figure S2**

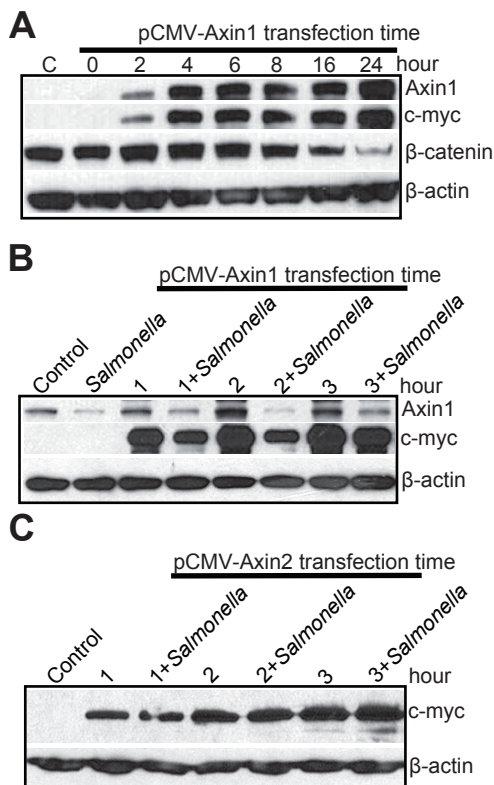

**Figure S2.** *Salmonella* reduces Axin1 expression through ubiquitination and SUMOylation. (A) Axin1 over-expression in intestinal epithelial cells. c-myc-tagged Axin1 in HCT116 cells after transfection for 24 hours. Note the decreased total  $\beta$ -catenin levels after Axin overexpression for 24 hours in the intestinal epithelial cells. (B) Axin1 reduction in the Axin1-overexpressing intestinal epithelial cells infected with wild-type (WT) *Salmonella*. C-myc-tagged Axin was expressed in HCT116 cells after transfection for only 3 hours. (C) Axin2 is not altered in the Axin2-overexpressing intestinal epithelial cells infected with wild-type *Salmonella* (WT).
