# Supplementary material for: Axin1 Prevents Salmonella Invasiveness and Inflammatory Response in Intestinal Epithelial Cells
Source: PLOS journal article supplement (doi:10.1371/journal.pone.0034942), 2012-04-11
Supplement: S3 (10.1371/journal.pone.0034942.s003) [file journal.pone.0034942.s003]

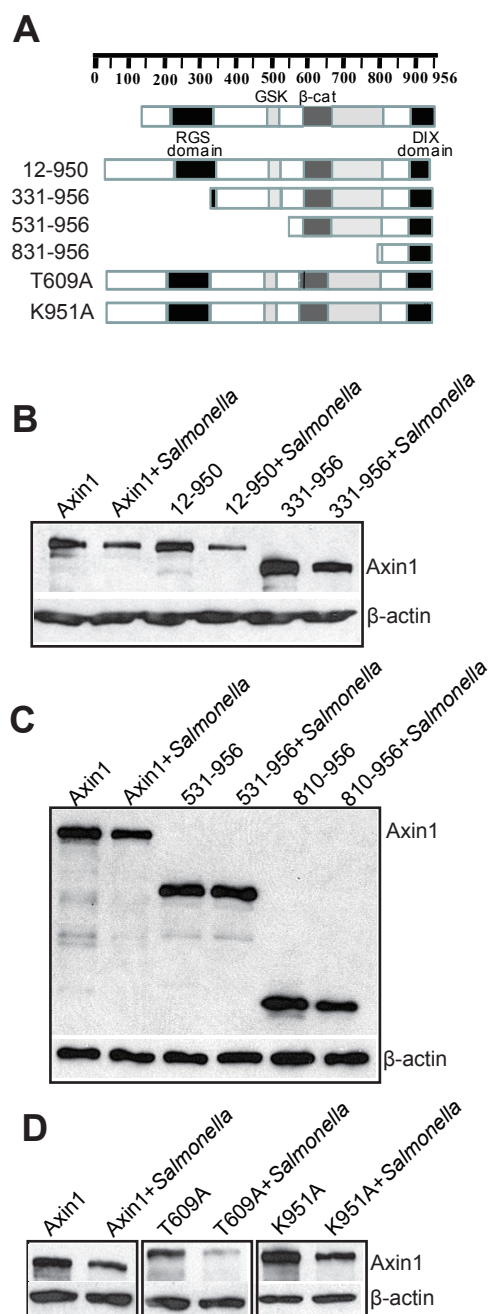

**Figure S3.** Protein levels of wild-type Axin1 and Axin1 mutants in cells with or without *Salmonella* colonization. (A) Diagrams of Axin1 mutant constructs. (B). Axin1 mutants (amino acid 12-950 and 331-956) were reduced after *Salmonella* infection (WT). (C). Axin1 mutants (amino acid 531-956 and 810-956) were reduced after *Salmonella* infection. (D) Protein levels of wild-type Axin1, Axin1T609A, and K951A in cells with or without *Salmonella* colonization. Please note the reduction of wild-type Axin1 and Axin1 mutants after WT *Salmonella* colonization.
