# Supplementary material for: Axin1 Prevents Salmonella Invasiveness and Inflammatory Response in Intestinal Epithelial Cells
Source: PLOS journal article supplement (doi:10.1371/journal.pone.0034942), 2012-04-11
Supplement: S4 (10.1371/journal.pone.0034942.s004) [file journal.pone.0034942.s004]

**Figure S4**

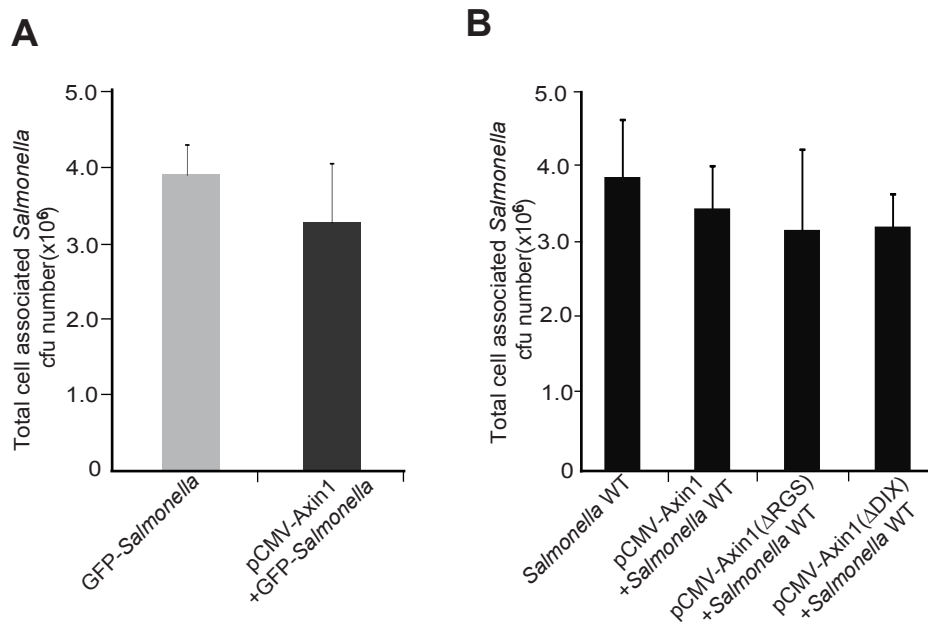

**Figure S4.** Axin1 expression in the intestinal epithelial cells did not change bacterial association. Cells overexpressing Axin1 had decreased invasion of *Salmonella*. (A) Number of *Salmonella* associated with intestinal epithelial cells with different Axin1 levels. (B) Number of bacteria associated with intestinal epithelial cells with different Axin1 mutations. Data are expressed as mean  $\pm$  SD. n= 3 separate experiments.
