# Supplementary material for: Axin1 Prevents Salmonella Invasiveness and Inflammatory Response in Intestinal Epithelial Cells
Source: PLOS journal article supplement (doi:10.1371/journal.pone.0034942), 2012-04-11
Supplement: S5 (10.1371/journal.pone.0034942.s005) [file journal.pone.0034942.s005]

Figure S5

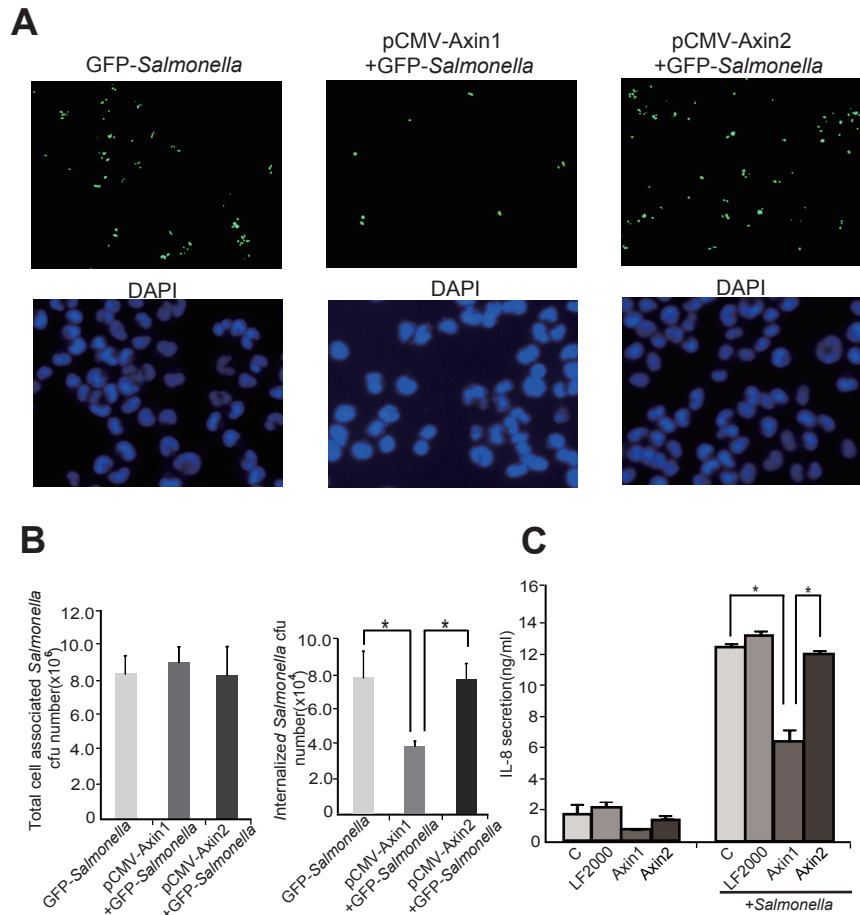

**Figure S5.** Axin2 expression in the intestinal epithelial cells did not change bacterial infection and inflammatory responses. (A) Cells overexpressing Axin2 had the same number of the GFP-*Salmonella* (Green) as those in the control cells with normal Axin2 level. However, Axin1 overexpression lowered bacterial invasion. (B) Number of bacteria associated with intestinal epithelial cells in Axin1 or 2-overexpressed HCT116 cells after *Salmonella* colonization. (C) IL-8 protein secretion in cell culture media in Axin1 or 2-overexpressing HCT116 cells after *Salmonella* colonization. Data are expressed as mean  $\pm$  SD. \*  $P < 0.05$ .  $n = 3$  separate experiments.
